# Supplementary material for: Tag SNP selection for prediction of tick resistance in Brazilian Braford and Hereford cattle breeds using Bayesian methods
Source: PubMed Central journal article supplement (PMC5471684; doi:10.1186/s12711-017-0325-2), 2017-06-15
Supplement: 12711_2017_325_MOESM1_ESM.pdf [file 12711_2017_325_MOESM1_ESM.pdf]

Additional file 1: SNP Name, Reference Sequence, Chromosome and Position (Chr\_Pos), window coded number by GenSel in physical map order, description of the genes (Symbol, database search, name, HGNC\_id, genome which were mapped) mapped to the 58 SNP markers selected from the GWAS analysis.

| SNP_Name                            | SNP_RefSeq  | Chr_Pos     | Window | Gene_Symbol | Database | Gene_Name                                            | HGNC_ID    | Genome_map | Samp. <sup>1</sup> |
|-------------------------------------|-------------|-------------|--------|-------------|----------|------------------------------------------------------|------------|------------|--------------------|
| BTB-01301015                        | rs42429246  | 1_147255491 | 147    | PCBP3       | Ensembl  | poly(rC) binding protein 3                           | HGNC:8651  | Bos taurus | 5                  |
| BTB-00077766                        | rs43285940  | 2_4619367   | 163    | POLR2D      | Ensembl  | polymerase (RNA) II (DNA directed) polypeptide D     | HGNC:9191  | Bos taurus | 5                  |
|                                     |             |             |        | AMMECR1L    | Ensembl  | AMMECR1-like                                         | HGNC:28658 | Bos taurus |                    |
|                                     |             |             |        | WDR33       | Ensembl  | WD repeat domain 33                                  | HGNC:25651 | Bos taurus |                    |
| BTB-00082871                        | rs43293394  | 2_20699862  | 179    | HOXD3       | Ensembl  | homeobox D3                                          | HGNC:5137  | Bos taurus | 8                  |
|                                     |             |             |        | MTX2        | Ensembl  | metaxin 2                                            | HGNC:7506  | Bos taurus |                    |
|                                     |             |             |        | HOXD4       | Ensembl  | homeobox D4                                          | HGNC:5138  | Bos taurus |                    |
|                                     |             |             |        | bta-mir-10b | Ensembl  | miRBase                                              |            | Bos taurus |                    |
|                                     |             |             |        | HOXD1       | Ensembl  | homeobox D1                                          | HGNC:5132  | Bos taurus |                    |
| ARS-BFGL-NGS-111213                 | rs110504727 | 2_55308672  | 214    | LRP1B       | NCBI     | low density lipoprotein receptor-related protein 1B  | HGNC:6693  | Bos taurus | 7                  |
| BTB-01165311                        | rs42320860  | 2_55283216  | 214    | LRP1B       | NCBI     | low density lipoprotein receptor-related protein 1B  | HGNC:6693  | Bos taurus | 6                  |
| Hapmap36094-<br>SCAFFOLD96944_22403 | rs29026592  | 2_102214656 | 261    | SNORA11     | Ensembl  | small nucleolar RNA, H/ACA box 11                    | HGNC:32599 | Bos taurus | 4                  |
| BTA-92857-no-rs                     | rs41662298  | 2_102723466 | 261    | SPAG16      | NCBI     | sperm associated antigen 16                          | HGNC:23225 | Bos taurus | 3                  |
| ARS-BFGL-NGS-102874                 | rs109276708 | 2_123152276 | 282    | SDC3        | Ensembl  | syndecan 3                                           | HGNC:10660 | Bos taurus | 4                  |
|                                     |             |             |        | PUM1        | Ensembl  | pumilio RNA-binding family member 1                  | HGNC:14957 | Bos taurus |                    |
|                                     |             |             |        | SNORD103    | Ensembl  | Small nucleolar RNA SNORD103/SNORD85                 |            | Bos taurus |                    |
| BTB-00117780                        | rs43328895  | 2_131393741 | 290    | CDC42       | Ensembl  | cell division cycle 42                               | HGNC:1736  | Bos taurus | 5                  |
|                                     |             |             |        | U6          | Ensembl  | RNA, U6 small nuclear 1                              | HGNC:10227 | Bos taurus |                    |
|                                     |             |             |        | WNT4        | Ensembl  | wingless-type MMTV integration site family, member 4 | HGNC:12783 | Bos taurus |                    |
|                                     |             |             |        | U6          | Ensembl  | RNA, U6 small nuclear 50, pseudogene                 | HGNC:10229 | Bos taurus |                    |
|                                     |             |             |        | CELA3B      | Ensembl  | chymotrypsin-like elastase family, member 3B         | HGNC:15945 | Bos taurus |                    |
| ARS-BFGL-NGS-113378                 | rs43319306  | 2_134486603 | 293    | PAX7        | Ensembl  | paired box 7                                         | HGNC:8621  | Bos taurus | 6                  |
|                                     |             |             |        | TAS1R2      | Ensembl  | taste receptor, type 1, member 2                     | HGNC:14905 | Bos taurus |                    |

<sup>1</sup> Sampling number of each SNP within those ten cross-validation subsets proposed after GWAS and tag SNP selection strategy.

Additional file 1\_cont: SNP Name, Reference Sequence, Chromosome and Position (Chr\_Pos), window coded number by GenSel in physical map order, description of the genes (Symbol, database search, name, HGNC\_id, genome which were mapped) mapped to the 58 SNP markers selected from the GWAS analysis.

| SNP_Name               | SNP_RefSeq  | Chr_Pos     | Window | Gene_Symbol  | Database | Gene_Name                                                                                    | HGNC_ID    | Genome_map   | Samp. <sup>1</sup> |
|------------------------|-------------|-------------|--------|--------------|----------|----------------------------------------------------------------------------------------------|------------|--------------|--------------------|
| ARS-BFGL-NGS-119309    | rs110043221 | 3_33691011  | 329    | EPS8L3       | Ensembl  | EPS8-like 3                                                                                  | HGNC:21297 | Bos taurus   | 1                  |
|                        |             |             |        | GSTM1        | Ensembl  | glutathione S-transferase mu 1                                                               | HGNC:4632  | Bos taurus   |                    |
|                        |             |             |        | GSTM3        | Ensembl  | glutathione S-transferase mu 3 (brain)                                                       | HGNC:4635  | Bos taurus   |                    |
|                        |             |             |        | CSF1         | Ensembl  | colony stimulating factor 1 (macrophage)                                                     | HGNC:2432  | Bos taurus   |                    |
|                        |             |             |        | bta-mir-2413 | Ensembl  | bta-mir-2413 (miRBase)                                                                       |            | Bos taurus   |                    |
| ARS-BFGL-NGS-33433     | rs109299452 | 3_68207361  | 364    | LOC102724799 | NCBI     | uncharacterized LOC102724799                                                                 |            | Homo sapiens | 3                  |
| BTB-00169573           | rs43385164  | 4_24209956  | 442    |              |          |                                                                                              |            |              | 4                  |
| Hapmap45129-BTA-72713  | rs41587961  | 4_24932445  | 442    | ISPD         | Ensembl  | isoprenoid synthase domain containing                                                        | HGNC:37276 | Bos taurus   | 4                  |
|                        |             |             |        | ISPD         | Ensembl  | isoprenoid synthase domain containing                                                        | HGNC:37276 | Bos taurus   |                    |
|                        |             |             |        | SOSTDC1      | Ensembl  | sclerostin domain containing 1                                                               | HGNC:21748 | Bos taurus   |                    |
| ARS-BFGL-NGS-36591     | rs43403429  | 4_66830563  | 484    | FKBP14       | Ensembl  | FK506 binding protein 14, 22 kDa                                                             | HGNC:18625 | Bos taurus   | 4                  |
|                        |             |             |        | WIPF3        | Ensembl  | WAS/WASL interacting protein family, member 3                                                | HGNC:22004 | Bos taurus   |                    |
|                        |             |             |        | SCRN1        | Ensembl  | secernin 1                                                                                   | HGNC:22192 | Bos taurus   |                    |
|                        |             |             |        | PLEKHA8      | Ensembl  | pleckstrin homology domain containing, family A (phosphoinositide binding specific) member 8 | HGNC:30037 | Bos taurus   |                    |
| Hapmap25270-BTA-142450 | rs109082916 | 4_97015274  | 515    | PLEX2        | Ensembl  | PLEX2 (Bos taurus plexin A4 (PLXNA4), mRNA)                                                  |            | Bos taurus   | 4                  |
| Hapmap22875-BTA-155031 | rs110223270 | 4_113721793 | 531    | ZNF775       | Ensembl  | zinc finger protein 775                                                                      | HGNC:28501 | Bos taurus   | 8                  |
|                        |             |             |        | GIMAP8       | Ensembl  | GTPase, IMAP family member 8                                                                 | HGNC:21792 | Bos taurus   |                    |
|                        |             |             |        | GIMAP7       | Ensembl  | GTPase, IMAP family member 7                                                                 | HGNC:22404 | Bos taurus   |                    |
| Hapmap52967-rs29017027 | rs29017027  | 5_14044364  | 553    | DNAH5        | NCBI     | dynein, axonemal, heavy chain 5                                                              |            | Homo sapiens | 8                  |
| Hapmap30881-BTA-159706 | rs110661345 | 6_3994395   | 664    | QRFPR        | Ensembl  | pyroglutamylated RFamide peptide receptor                                                    | HGNC:15565 | Bos taurus   | 4                  |
|                        |             |             |        | U6           | Ensembl  | RNA, U6 small nuclear 1                                                                      | HGNC:10227 | Bos taurus   |                    |
|                        |             |             |        | U6           | Ensembl  | RNA, U6 small nuclear 50, pseudogene                                                         | HGNC:10229 | Bos taurus   |                    |
| BTB-01280976           | rs42404150  | 6_4193024   | 665    | QRFPR        | Ensembl  | pyroglutamylated RFamide peptide receptor                                                    | HGNC:15565 | Bos taurus   | 5                  |
| BTB-02002785           | rs43106284  | 6_49130874  | 710    | LOC100421158 | NCBI     | piggyBac transposable element derived 4 pseudogene                                           |            | Homo sapiens | 9                  |
| ARS-BFGL-NGS-111257    | rs110116877 | 7_13426119  | 794    | CACNA1A      | Ensembl  | calcium channel, voltage-dependent, P/Q type, alpha 1A subunit                               | HGNC:1388  | Bos taurus   | 4                  |

<sup>1</sup> Sampling number of each SNP within those ten cross-validation subsets proposed after GWAS and tag SNP selection strategy.

Additional file 1\_cont: SNP Name, Reference Sequence, Chromosome and Position (Chr\_Pos), window coded number by GenSel in physical map order, description of the genes (Symbol, database search, name, HGNC\_id, genome which were mapped) mapped to the 58 SNP markers selected from the GWAS analysis.

| SNP_Name               | SNP_RefSeq  | Chr_Pos     | Window | Gene_Symbol  | Database | Gene_Name                                                                     | HGNC_ID    | Genome_map   | Samp. <sup>1</sup> |
|------------------------|-------------|-------------|--------|--------------|----------|-------------------------------------------------------------------------------|------------|--------------|--------------------|
| ARS-BFGL-NGS-109534    | rs109115115 | 7_13608935  | 794    | TRMT1        | Ensembl  | tRNA methyltransferase 1 homolog (S. cerevisiae)                              | HGNC:25980 | Bos taurus   | 4                  |
|                        |             |             |        | NFIX         | Ensembl  | nuclear factor I/X (CCAAT-binding transcription factor)                       | HGNC:7788  | Bos taurus   |                    |
|                        |             |             |        | STX10        | Ensembl  | syntaxin 10                                                                   | HGNC:11428 | Bos taurus   |                    |
|                        |             |             |        | NACC1        | Ensembl  | nucleus accumbens associated 1                                                | HGNC:20967 | Bos taurus   |                    |
|                        |             |             |        | LYL1         | Ensembl  | lymphoblastic leukemia associated hematopoiesis regulator 1                   | HGNC:6734  | Bos taurus   |                    |
|                        |             |             |        | IER2         | Ensembl  | immediate early response 2                                                    | HGNC:28871 | Bos taurus   |                    |
| BTB-01398754           | rs42522770  | 8_50525859  | 944    | LOC100422267 | NCBI     | coagulation factor III (thromboplastin, tissue factor) pseudogene             |            | Homo sapiens | 7                  |
| Hapmap40677-BTA-121871 | rs41622905  | 8_107821440 | 1001   | ASTN2        | NCBI     | astrotactin 2                                                                 | HGNC:17021 | Bos taurus   | 6                  |
| ARS-BFGL-NGS-107048    | rs109728630 | 10_18395377 | 1132   | THSD4        | NCBI     | thrombospondin, type I, domain containing 4                                   | HGNC:25835 | Bos taurus   | 4                  |
| Hapmap32096-BTA-150413 | rs110820714 | 10_46199529 | 1159   | HERC1        | Ensembl  | HECT and RLD domain containing E3 ubiquitin protein ligase family member 1    | HGNC:4867  | Bos taurus   | 7                  |
|                        |             |             |        | DAPK2        | Ensembl  | death-associated protein kinase 2                                             | HGNC:2675  | Bos taurus   |                    |
| ARS-BFGL-NGS-60054     | rs110382174 | 10_46571563 | 1159   | USP3         | Ensembl  | ubiquitin specific peptidase 3                                                | HGNC:12626 | Bos taurus   | 8                  |
| Hapmap58695-rs29019899 | rs29019899  | 10_51735816 | 1164   | LIPC         | Ensembl  | lipase, hepatic                                                               | HGNC:6619  | Bos taurus   | 10                 |
|                        |             |             |        | ADAM10       | Ensembl  | ADAM metallopeptidase domain 10                                               | HGNC:188   | Bos taurus   |                    |
|                        |             |             |        | 5S_rRNA      | Ensembl  | 5S_rRNA (5S ribosomal RNA)                                                    |            | Bos taurus   |                    |
| ARS-BFGL-NGS-111871    | rs109034555 | 10_77105887 | 1190   | PLEKHG3      | Ensembl  | pleckstrin homology domain containing, family G (with RhoGef domain) member 3 | HGNC:20364 | Bos taurus   | 1                  |
|                        |             |             |        | SPTB         | Ensembl  | spectrin, beta, erythrocytic                                                  | HGNC:11274 | Bos taurus   |                    |
|                        |             |             |        | PPP1R36      | Ensembl  | protein phosphatase 1, regulatory subunit 36                                  | HGNC:20097 | Bos taurus   |                    |
| BTB-00464454           | rs43669951  | 11_21242337 | 1239   | MORN2        | Ensembl  | MORN repeat containing 2                                                      | HGNC:30166 | Bos taurus   | 5                  |
|                        |             |             |        | SOS1         | Ensembl  | son of sevenless homolog 1 (Drosophila)                                       | HGNC:11187 | Bos taurus   |                    |
|                        |             |             |        | ARHGEF33     | Ensembl  | Rho guanine nucleotide exchange factor (GEF) 33                               | HGNC:37252 | Bos taurus   |                    |
|                        |             |             |        | DHX57        | Ensembl  | DEAH (Asp-Glu-Ala-Asp/His) box polypeptide 57                                 | HGNC:20086 | Bos taurus   |                    |
|                        |             |             |        | GEMIN6       | Ensembl  | gem (nuclear organelle) associated protein 6                                  | HGNC:20044 | Bos taurus   |                    |

<sup>1</sup> Sampling number of each SNP within those ten cross-validation subsets proposed after GWAS and tag SNP selection strategy.

Additional file 1\_cont: SNP Name, Reference Sequence, Chromosome and Position (Chr\_Pos), window coded number by GenSel in physical map order, description of the genes (Symbol, database search, name, HGNC\_id, genome which were mapped) mapped to the 58 SNP markers selected from the GWAS analysis.

| SNP_Name               | SNP_RefSeq  | Chr_Pos      | Window | Gene_Symbol    | Database | Gene_Name                                                  | HGNC_ID    | Genome_map   | Samp. <sup>1</sup> |
|------------------------|-------------|--------------|--------|----------------|----------|------------------------------------------------------------|------------|--------------|--------------------|
| Hapmap60779-rs29022104 | rs29022104  | 11_65975590  | 1283   | LOC100420020   | NCBI     | transmembrane protein 55B pseudogene                       |            | Homo sapiens | 7                  |
| ARS-BFGL-NGS-111179    | rs110144789 | 11_101217080 | 1319   | FIBCD1         | Ensembl  | fibrinogen C domain containing 1                           | HGNC:25922 | Bos taurus   | 9                  |
|                        |             |              |        | QRFP           | Ensembl  | pyroglutamylated RFamide peptide                           | HGNC:29982 | Bos taurus   |                    |
|                        |             |              |        | LAMC3          | Ensembl  | laminin, gamma 3                                           | HGNC:6494  | Bos taurus   |                    |
|                        |             |              |        | ABL1           | Ensembl  | ABL proto-oncogene 1, non-receptor tyrosine kinase         | HGNC:76    | Bos taurus   |                    |
| Hapmap44228-BTA-34185  | rs111003257 | 13_14814734  | 1429   |                |          |                                                            |            |              | 7                  |
| Hapmap40517-BTA-33731  | rs41577070  | 13_73782308  | 1488   | snoU2_19       | Ensembl  | Small nucleolar RNA U2-19                                  |            | Bos taurus   | 6                  |
|                        |             |              |        | U2             | Ensembl  | RNA, U2 small nuclear 5, pseudogene                        | HGNC:10155 | Bos taurus   |                    |
|                        |             |              |        | U2             | Ensembl  | RNA, U2 small nuclear 1                                    | HGNC:10142 | Bos taurus   |                    |
|                        |             |              |        | ADA            | Ensembl  | adenosine deaminase                                        | HGNC:186   | Bos taurus   |                    |
|                        |             |              |        | WISP2          | Ensembl  | WNT1 inducible signaling pathway protein 2                 | HGNC:12770 | Bos taurus   |                    |
|                        |             |              |        | U2             | Ensembl  | RNA, U2 small nuclear 2, pseudogene                        | HGNC:10152 | Bos taurus   |                    |
|                        |             |              |        | PKIG           | Ensembl  | protein kinase (cAMP-dependent, catalytic) inhibitor gamma | HGNC:9019  | Bos taurus   |                    |
|                        |             |              |        | U2             | Ensembl  | RNA, U2 small nuclear 4, pseudogene                        | HGNC:10154 | Bos taurus   |                    |
|                        |             |              |        | RIMS4          | Ensembl  | regulating synaptic membrane exocytosis 4                  | HGNC:16183 | Bos taurus   |                    |
|                        |             |              |        | KCNK15         | Ensembl  | potassium channel, two pore domain subfamily K, member 15  | HGNC:13814 | Bos taurus   |                    |
|                        |             |              |        | U2             | Ensembl  | RNA, U2 small nuclear 3, pseudogene                        | HGNC:10153 | Bos taurus   |                    |
|                        |             |              |        | snoU2-30       | Ensembl  | Small nucleolar RNA U2-30                                  |            | Bos taurus   |                    |
| BTA-33938-no-rs        | rs41567254  | 13_80350185  | 1495   | SALL4          | Ensembl  | spalt-like transcription factor 4                          | HGNC:15924 | Bos taurus   | 6                  |
|                        |             |              |        | ATP9A          | Ensembl  | ATPase, class II, type 9A                                  | HGNC:13540 | Bos taurus   |                    |
| ARS-BFGL-NGS-112197    | rs110051873 | 13_80563915  | 1495   | ZFP64          | Ensembl  | ZFP64 zinc finger protein                                  | HGNC:15940 | Bos taurus   | 6                  |
| Hapmap41120-BTA-99310  | rs41668729  | 13_80980304  | 1495   | LOC102724139   | NCBI     | uncharacterized LOC102724139                               |            | Homo sapiens | 7                  |
| Hapmap57013-rs29019369 | rs29019369  | 13_70790140  | 1485   | CHD6           | Ensembl  | chromodomain helicase DNA binding protein 6                | HGNC:19057 | Bos taurus   | 6                  |
|                        |             |              |        | bta-mir-544b-1 | Ensembl  | miRBase                                                    |            | Bos taurus   |                    |

<sup>1</sup>Sampling number of each SNP within those ten cross-validation subsets proposed after GWAS and tag SNP selection strategy.

Additional file 1\_cont: SNP Name, Reference Sequence, Chromosome and Position (Chr\_Pos), window coded number by GenSel in physical map order, description of the genes (Symbol, database search, name, HGNC\_id, genome which were mapped) mapped to the 58 SNP markers selected from the GWAS analysis.

| SNP_Name                       | SNP_RefSeq  | Chr_Pos     | Window | Gene_Symbol | Database | Gene_Name                                                           | HGNC_ID    | Genome_map   | Samp. <sup>1</sup> |
|--------------------------------|-------------|-------------|--------|-------------|----------|---------------------------------------------------------------------|------------|--------------|--------------------|
| BTB-00915241                   | rs42075995  | 14_54323858 | 1553   | CSMD3       | Ensembl  | CUB and Sushi multiple domains 3                                    | HGNC:19291 | Bos taurus   | 10                 |
| ARS-BFGL-NGS-5811              | rs110197574 | 15_37534610 | 1621   | RPS15P8     | NCBI     | ribosomal protein S15 pseudogene 8                                  |            | Homo sapiens | 11                 |
| Hapmap51782-BTA-95909          | rs41665212  | 15_37575605 | 1621   | RPS15P8     | NCBI     | ribosomal protein S15 pseudogene 8                                  |            | Homo sapiens | 9                  |
| Hapmap45825-BTA-25376          | rs41629346  | 15_72980544 | 1656   | NEO1        | NCBI     | neogenin 1                                                          |            | Homo sapiens | 4                  |
| ARS-BFGL-NGS-40365             | rs41257804  | 16_40059619 | 1709   | MYOC        | Ensembl  | myocilin, trabecular meshwork inducible glucocorticoid response     | HGNC:7610  | Bos taurus   | 8                  |
|                                |             |             |        | VAMP4       | Ensembl  | vesicle-associated membrane protein 4                               | HGNC:12645 | Bos taurus   |                    |
|                                |             |             |        | DNM3        | Ensembl  | dynamamin 3                                                         | HGNC:29125 | Bos taurus   |                    |
|                                |             |             |        | METTL13     | Ensembl  | methyltransferase like 13                                           | HGNC:24248 | Bos taurus   |                    |
| BTB-01197909                   | rs42354418  | 16_40086288 | 1709   | VAMP4       | Ensembl  | vesicle-associated membrane protein 4                               | HGNC:12645 | Bos taurus   | 6                  |
|                                |             |             |        | METTL13     | Ensembl  | methyltransferase like 13                                           | HGNC:24248 | Bos taurus   |                    |
|                                |             |             |        | DNM3        | Ensembl  | dynamamin 3                                                         | HGNC:29125 | Bos taurus   |                    |
| Hapmap48746-BTA-40116          | rs41583441  | 16_74283537 | 1743   | KCNH1       | Ensembl  | potassium channel, voltage gated eag related subfamily H, member 1  | HGNC:6250  | Bos taurus   | 3                  |
| ARS-BFGL-BAC-27352             | rs109822497 | 17_7756498  | 1758   | DCLK2       | Ensembl  | doublecortin-like kinase 2                                          | HGNC:19002 | Bos taurus   | 4                  |
| Hapmap34041-BES1_Contig298_838 | rs43708490  | 20_17837675 | 1974   | ZSWIM6      | Ensembl  | zinc finger, SWIM-type containing 6                                 | HGNC:29316 | Bos taurus   | 9                  |
| Hapmap28040-BTA-134983         | rs109850399 | 20_19917959 | 1976   | 5S_rRNA     | Ensembl  | 5S_rRNA (5S ribosomal RNA)                                          |            | Bos taurus   | 5                  |
| Hapmap43377-BTA-85612          | rs41660483  | 20_56196291 | 2013   | U6          | Ensembl  | RNA, U6 small nuclear 50, pseudogene                                | HGNC:10229 | Bos taurus   | 4                  |
|                                |             |             |        | MYO10       | Ensembl  | myosin X                                                            | HGNC:7593  | Bos taurus   |                    |
|                                |             |             |        | SNORA9      | Ensembl  | small nucleolar RNA, H/ACA box 9                                    | HGNC:32597 | Bos taurus   |                    |
|                                |             |             |        | U6          | Ensembl  | RNA, U6 small nuclear 1                                             | HGNC:10227 | Bos taurus   |                    |
| ARS-BFGL-NGS-13702             | rs109546362 | 20_71498820 | 2028   | TPPP        | Ensembl  | tubulin polymerization promoting protein                            | HGNC:24164 | Bos taurus   | 8                  |
|                                |             |             |        | NKD2        | Ensembl  | naked cuticle homolog 2 (Drosophila)                                | HGNC:17046 | Bos taurus   |                    |
|                                |             |             |        | BRD9        | Ensembl  | bromodomain containing 9                                            | HGNC:25818 | Bos taurus   |                    |
|                                |             |             |        | SLC12A7     | Ensembl  | solute carrier family 12 (potassium/chloride transporter), member 7 | HGNC:10915 | Bos taurus   |                    |
|                                |             |             |        | TRIP13      | Ensembl  | thyroid hormone receptor interactor 13                              | HGNC:12307 | Bos taurus   |                    |

<sup>1</sup> Sampling number of each SNP within those ten cross-validation subsets proposed after GWAS and tag SNP selection strategy.

Additional file 1\_cont: SNP Name, Reference Sequence, Chromosome and Position (Chr\_Pos), window coded number by GenSel in physical map order, description of the genes (Symbol, database search, name, HGNC\_id, genome which were mapped) mapped to the 58 SNP markers selected from the GWAS analysis.

| SNP_Name                        | SNP_RefSeq  | Chr_Pos     | Window | Gene_Symbol | Database | Gene_Name                                  | HGNC_ID    | Genome_map | Samp. <sup>1</sup> |
|---------------------------------|-------------|-------------|--------|-------------|----------|--------------------------------------------|------------|------------|--------------------|
| BTB-00849206                    | rs42019145  | 22_45866182 | 2146   | ERC2        | NCBI     | ELKS/RAB6-interacting/CAST family member 2 | HGNC:31922 | Bos taurus | 5                  |
| ARS-BFGL-NGS-84660              | rs109886577 | 25_15365566 | 2294   |             |          |                                            |            |            | 4                  |
| ARS-BFGL-BAC-37178              | rs42066295  | 25_30062438 | 2309   | AUTS2       | Ensembl  | autism susceptibility candidate 2          | HGNC:14262 | Bos taurus | 3                  |
| Hapmap48932-BTA-88109           | rs41663418  | 28_20480901 | 2440   |             |          |                                            |            |            | 6                  |
| BTB-01129090                    | rs43733032  | 28_20915841 | 2440   |             |          |                                            |            |            | 6                  |
| Hapmap34915-BES7_Contig278_1082 | rs43702480  | 28_20988266 | 2440   |             |          |                                            |            |            | 5                  |
| BTA-66199-no-rs                 | rs43707003  | 29_48735363 | 2515   | SHANK2      | NCBI     | SH3 and multiple ankyrin repeat domains 2  | HGNC:14295 | Bos taurus | 4                  |

<sup>1</sup>Sampling number of each SNP within those ten cross-validation subsets proposed after GWAS and tag SNP selection strategy.
